# Supplementary material
Source: PubMed Central journal article supplement (PMC10732461)
Supplement: NIHMS1946399-supplement-1.pdf [file NIHMS1946399-supplement-1.pdf]

**Suppl. Table 1:** Clinical characteristics of pregnant subjects used in all experiments.

|                                  | <b>Controls (n=20)</b> | <b>EtOH Users (n=20)</b> |
|----------------------------------|------------------------|--------------------------|
| Age: maternal (years $\pm$ SD)   | 24.15 $\pm$ 2.3        | 28.0 $\pm$ 2.7           |
| GA (weeks $\pm$ SD)              | 14.92 $\pm$ 1.58       | 15.22 $\pm$ 1.6          |
| GA range (weeks)                 | 11.1 to 21             | 11.5 to 21               |
| BMI: Body Mass Index ( $\pm$ SD) | 24.4 $\pm$ 3.3         | 26.1 $\pm$ 1.5           |
| Hispanic Ethnicity (%)           | 15                     | 15                       |
| Race                             |                        |                          |
| White (%)                        | 50                     | 50                       |
| Black (%)                        | 50                     | 50                       |
| Male Fetal Sex (%)               | 50                     | 50                       |
